# Supplementary material
Source: PubMed Central journal article supplement (PMC1805482)
Supplement: NIHMS15776-supplement-02.pdf [file NIHMS15776-supplement-02.pdf]

## Supplementary Table 1 - Transcripts Altered by NPM siRNA

| <u>Gene Name</u> | <u>Accession Number</u> | <u>Function</u>                                                | <u>Normalized Expression Values</u> |             |             |
|------------------|-------------------------|----------------------------------------------------------------|-------------------------------------|-------------|-------------|
|                  |                         |                                                                | <u>si con</u>                       | <u>si#1</u> | <u>si#2</u> |
| ABCA5            | NM_018672               | unknown                                                        | 0.28                                | 0.47        | 0.43        |
| ADAM2            | H300001299              | Extracellular Matrix Architecture                              | 0.50                                | 0.95        | 1.02        |
| ANK3             | NM_020987               | Membrane Adaptor                                               | 0.28                                | 0.48        | 0.43        |
| CD27             | NM_001242               | TNF Receptor                                                   | 1.18                                | 0.71        | 0.73        |
| CPS1             | NM_001875               | Carbamoyl Phosphate<br>Synthesis                               | 0.04                                | 0.13        | 0.06        |
| CXADR            | NM_001338               | Cell-Cell Adhesion                                             | 0.40                                | 0.68        | 0.62        |
| FAM8A1           | NM_016255               | unknown                                                        | 0.37                                | 0.72        | 0.68        |
| FEM1B            | NM_015322               | unknown                                                        | 0.25                                | 0.39        | 0.41        |
| GALNT1           | NM_020474               | Protein Glycosylation                                          | 0.39                                | 0.75        | 0.60        |
| GRB10            | NM_005311               | Growth Factor Signaling                                        | 2.61                                | 1.67        | 1.73        |
| H200014313       | AL035494                | unknown                                                        | 0.14                                | 0.25        | 0.22        |
| Histone H2B      | NM_003528               | Core Histone                                                   | 0.49                                | 0.76        | 0.77        |
| hMOB1            | AK027043                | Cytokinesis                                                    | 0.77                                | 1.47        | 1.23        |
| HSPC159          | NM_014181               | unknown                                                        | 2.34                                | 1.21        | 1.22        |
| IGJ              | NM_144646               | Immunoglobulin J                                               | 0.04                                | 0.09        | 0.08        |
| KIAA1196         | AL834525                | unknown                                                        | 0.54                                | 1.04        | 0.90        |
| KLHDC5           | AB037761                | unknown                                                        | 0.87                                | 1.33        | 1.47        |
| LEF1             | NM_016269               | Transcriptional Regulation,<br>Growth Factor and Wnt Signaling | 0.15                                | 0.26        | 0.27        |
| LINE1            | AF003535                | LINE1 element                                                  | 0.33                                | 0.55        | 0.51        |
| LINE1            | AF003535                | LINE1 element                                                  | 0.29                                | 0.48        | 0.43        |
| LINE1            | AF003535                | LINE1 element                                                  | 0.40                                | 0.65        | 0.66        |
| LINE1            | AF149422                | LINE1 element                                                  | 0.31                                | 0.55        | 0.48        |
| LINE1            | M22333                  | LINE1 element                                                  | 0.35                                | 0.60        | 0.58        |
| LINE1            | M22333                  | LINE1 element                                                  | 0.27                                | 0.46        | 0.42        |
| LINE1            | M22333                  | LINE1 element                                                  | 0.42                                | 0.79        | 0.67        |
| LINE1            | M22333                  | LINE1 element                                                  | 0.28                                | 0.51        | 0.45        |
| LINE1            | M22333                  | LINE1 element                                                  | 0.36                                | 0.64        | 0.55        |
| LINE1            | M80340                  | LINE1 element                                                  | 0.29                                | 0.47        | 0.50        |
| LINE1            | M80343                  | LINE1 element                                                  | 0.32                                | 0.54        | 0.53        |
| LINE1            | M80343                  | LINE1 element                                                  | 0.32                                | 0.54        | 0.50        |
| LINE1            | M80343                  | LINE1 element                                                  | 0.32                                | 0.52        | 0.49        |
| LINE1            | M80343                  | LINE1 element                                                  | 0.32                                | 0.53        | 0.53        |
| LINE1            | M80343                  | LINE1 element                                                  | 0.30                                | 0.50        | 0.51        |
| LINE1            | M80343                  | LINE1 element                                                  | 0.36                                | 0.66        | 0.56        |
| LINE1            | M80343                  | LINE1 element                                                  | 0.31                                | 0.56        | 0.54        |
| LINE1            | M80343                  | LINE1 element                                                  | 0.34                                | 0.53        | 0.55        |
| LINE1            | M80343                  | LINE1 element                                                  | 0.32                                | 0.49        | 0.53        |
| LINE1            | M80343                  | LINE1 element                                                  | 0.33                                | 0.53        | 0.53        |
| LINE1            | M80343                  | LINE1 element                                                  | 0.34                                | 0.54        | 0.54        |
| LINE1            | M80343                  | LINE1 element                                                  | 0.36                                | 0.55        | 0.55        |
| LINE1            | M80343                  | LINE1 element                                                  | 0.35                                | 0.54        | 0.55        |
| LINE1            | M80343                  | LINE1 element                                                  | 0.33                                | 0.51        | 0.51        |
| LINE1            | M80343                  | LINE1 element                                                  | 0.35                                | 0.56        | 0.56        |
| LINE1            | M80343                  | LINE1 element                                                  | 0.33                                | 0.53        | 0.51        |
| LINE1            | U93563                  | LINE1 element                                                  | 0.38                                | 0.66        | 0.57        |
| LINE1            | U93568                  | LINE1 element                                                  | 0.33                                | 0.54        | 0.53        |
| LINE1            | U93569                  | LINE1 element                                                  | 0.31                                | 0.51        | 0.47        |
| LINE1            | U93574                  | LINE1 element                                                  | 0.41                                | 0.70        | 0.63        |
| LINE1            | U93574                  | LINE1 element                                                  | 0.35                                | 0.57        | 0.55        |
| LINE1            | U93574                  | LINE1 element                                                  | 0.35                                | 0.58        | 0.56        |

|           |            |                                                                  |      |      |      |
|-----------|------------|------------------------------------------------------------------|------|------|------|
| LINE1     | X03717     | LINE1 element                                                    | 0.35 | 0.62 | 0.61 |
| L-plastin | NM_002298  | Actin Organization                                               | 0.17 | 0.27 | 0.27 |
| Lumican   | NM_002345  | ECM Architecture                                                 | 0.05 | 0.09 | 0.08 |
| MASTL     | NM_032844  | unknown                                                          | 0.70 | 1.14 | 1.13 |
| MRPL36    | NM_032479  | mt ribosomal protein                                             | 0.88 | 1.42 | 1.47 |
| NAG13     | AF194537   | unknown                                                          | 0.22 | 0.51 | 0.44 |
| NARF      | NM_015271  | unknown                                                          | 0.33 | 0.61 | 0.49 |
| Nesprin 2 | NM_015180  | Cell-Matrix Adhesion,<br>Nuclear Envelope Scaffold               | 0.59 | 1.13 | 0.94 |
| NPM1      | NM_002520  | Multifunctional Protein                                          | 1.49 | 0.60 | 0.75 |
| NRG1      | NM_013957  | Growth Factor Signaling                                          | 3.29 | 1.68 | 2.19 |
| NRG1      | NM_013959  | Growth Factor Signaling                                          | 2.48 | 1.48 | 1.60 |
| OR10K1    | AB065641   | Olfactory Receptor                                               | 0.45 | 0.88 | 1.04 |
| PAI-1     | NM_000602  | ECM Architecture                                                 | 1.09 | 0.69 | 0.70 |
| PINCH     | NM_004987  | Cell Adhesion Signaling                                          | 1.60 | 0.98 | 0.98 |
| RhAG      | NM_000324  | RBC Sodium Transport                                             | 0.06 | 0.16 | 0.09 |
| RHD       | H300006818 | RBC Membrane Structure                                           | 0.00 | 0.83 | 0.91 |
| SCHIP1    | NM_014575  | Growth Factor Signaling                                          | 2.61 | 1.68 | 1.70 |
| SET       | NM_003011  | Transcriptional Repression,<br>Protein Phosphatase 2A Inhibition | 0.60 | 0.91 | 0.98 |
| SET8      | NM_020382  | Transcriptional Repressor                                        | 1.44 | 0.74 | 0.83 |
| Sip1      | NM_014795  | Transcriptional Regulation,                                      | 0.51 | 1.02 | 1.00 |
| SLC7A5    | NM_003486  | Amino Acid Transport<br>Growth Factor Signaling                  | 0.74 | 0.48 | 0.49 |
| SURF4     | NM_033161  | unknown                                                          | 0.97 | 1.49 | 1.49 |
| ZDHHC3    | NM_016598  | unknown                                                          | 2.82 | 1.72 | 1.70 |
| ZNF167    | NM_018651  | unknown                                                          | 0.80 | 1.27 | 1.32 |
| ZNF83     | NM_018300  | unknown                                                          | 0.24 | 0.57 | 0.44 |
|           | H300001887 | unknown                                                          | 1.89 | 1.09 | 1.08 |
|           | FLJ32838   | unknown                                                          | 2.09 | 1.23 | 1.09 |
|           | H300005705 | unknown                                                          | 1.51 | 0.62 | 0.94 |
|           | H300007542 | unknown                                                          | 1.51 | 0.80 | 0.92 |
|           | H300000039 | unknown                                                          | 0.68 | 1.11 | 1.32 |
|           | H300009207 | unknown                                                          | 0.65 | 1.05 | 1.07 |
