# Supplementary material
Source: PubMed Central journal article supplement (PMC1805482)
Supplement: NIHMS15776-supplement-03.pdf [file NIHMS15776-supplement-03.pdf]

## Supplementary Table 2 - Transcripts Altered by NPM siRNA After Taxol Treatment

| <u>Gene Name</u> | <u>Accession Number</u> | <u>Function</u>                                       | <u>Normalized Expression Values</u> |             |             |                     |                   |                   |
|------------------|-------------------------|-------------------------------------------------------|-------------------------------------|-------------|-------------|---------------------|-------------------|-------------------|
|                  |                         |                                                       | <u>si con</u>                       | <u>si#1</u> | <u>si#2</u> | <u>si con + Tax</u> | <u>si#1 + Tax</u> | <u>si#2 + Tax</u> |
| ADAM2            | H300001299              | Extracellular Matrix Architecture                     | 0.50                                | 0.95        | 1.02        | 0.65                | 1.10              | 1.01              |
| DRMT2            | AF284223                | unknown                                               | 0.90                                | 1.04        | 1.16        | 0.77                | 1.32              | 1.41              |
| FAM8A1           | NM_016255               | unknown                                               | 0.37                                | 0.72        | 0.68        | 0.40                | 0.73              | 0.63              |
| FLJ22170         | AL831955                | unknown                                               | 0.76                                | 0.88        | 0.92        | 0.67                | 1.10              | 1.02              |
| H300005705       | H300005705              | unknown                                               | 1.51                                | 0.62        | 0.94        | 1.75                | 0.63              | 1.05              |
| H300007542       | H300007542              | unknown                                               | 1.51                                | 0.80        | 0.92        | 1.83                | 0.94              | 1.18              |
| Histone H2B      | NM_003528               | Core Histone                                          | 0.49                                | 0.76        | 0.77        | 0.62                | 1.24              | 1.11              |
| H-REV107         | NM_007069               | Growth Suppressor                                     | 1.07                                | 1.16        | 1.33        | 0.93                | 1.39              | 1.44              |
| KIAA0152         | NM_014730               | unknown                                               | 0.55                                | 0.77        | 0.82        | 0.44                | 0.75              | 0.76              |
| MRPL36           | NM_032479               | mt ribosomal protein                                  | 0.88                                | 1.42        | 1.47        | 0.75                | 1.15              | 1.23              |
| NPM1             | NM_002520               | Multifunctional Protein                               | 1.49                                | 0.60        | 0.75        | 1.79                | 0.63              | 0.78              |
| OR10AG1          | AB065594                | Olfactory Receptor                                    | 1.37                                | 0.96        | 0.96        | 1.54                | 0.86              | 1.01              |
| PLAC2            | NM_153375               | unknown                                               | 1.00                                | 0.99        | 1.07        | 1.35                | 0.84              | 0.89              |
| RNASE8           | NM_138331               | unknown                                               | 0.87                                | 0.96        | 1.23        | 0.76                | 1.29              | 1.30              |
| SET              | NM_003011               | Transcriptional Repression,<br>Cell Cycle Progression | 0.60                                | 0.91        | 0.98        | 0.60                | 0.94              | 0.91              |
| SET8             | NM_020382               | Transcriptional Repressor                             | 1.44                                | 0.74        | 0.83        | 1.87                | 1.09              | 1.11              |
| SURF4            | NM_033161               | unknown                                               | 0.97                                | 1.49        | 1.49        | 0.87                | 1.55              | 1.42              |
| TAF1A            | NM_005681               | Transcription of rRNA                                 | 1.28                                | 1.21        | 1.28        | 1.97                | 1.12              | 1.31              |
