# Supplementary material
Source: PubMed Central journal article supplement (PMC1805482)
Supplement: NIHMS15776-supplement-04.pdf [file NIHMS15776-supplement-04.pdf]

### Supplementary Table 3 - Real Time PCR Primers

| <u>gene name</u> | <u>forward</u>                  | <u>reverse</u>                  |
|------------------|---------------------------------|---------------------------------|
| NPM              | 5'-CCACCAGTGTTAAGGTTGA-3'       | 5'-CATCCTCCTCCTCTTCCATCTTCTG-3' |
| TAF1A            | 5'-CTGCAGCAGGAGGAGTTACG-3'      | 5'-TGCACCACTGAGCACAGATG-3'      |
| TAF1B            | 5'-AAGCGCTACCTTCAGAAGAG-3'      | 5'-TCTGTGGCATGGTCATCTTC-3'      |
| TAF1C            | 5'-TCCGGAAGAAGCCTCGAATG-3'      | 5'-CTGTGCGTTGCTGAGGTAAG-3'      |
| ACTIN            | 5'-TCACCCACACTGTGCCCATCTACGA-3' | 5'-CAGCGGAACCGCTCATTGCCAATGG-3' |
| 18S rRNA         | 5'-GCTGCTGGCACCAGACTT-3'        | 5'-CGGCTACCACATCCAAGG-3'        |
| CYCLOPHILIN A1   | 5'-GTGGCTCACTGTCTGTAATG-3'      | 5'-CACTCTAGGCTCAAGCAATC-3'      |
